# Supplementary material for: A Population Survey of Dietary Attitudes towards Gluten
Source: PubMed Central journal article supplement (PMC6628309; doi:10.3390/nu11061276), 2019-06-05
Supplement: nutrients-11-01276-s001.pdf [file nutrients-11-01276-s001.pdf]

# Medical Questionnaire On Gastrointestinal Symptoms

Dear Sir/Madam

We would be grateful if you would kindly complete this 1-5 minute questionnaire survey as part of a project being undertaken by the Gastroenterology department at the Royal Hallamshire Hospital, Sheffield. There are two parts to this questionnaire and although it asks about your bowel symptoms and past medical history, it is anonymous and the results will remain confidential. You may find parts of this questionnaire repetitive but please try and answer all the appropriate questions tailored for you. Should you have any queries or difficulties completing this survey, please ask our helpful young student doctors!

Thank you for your co-operation and time in completing this questionnaire

## Part 1: This asks for basic information about yourself, any abdominal symptoms and your general state of health

Q1) Age \_\_\_\_\_

Q2) Male  or Female

Q3) Employed , Unemployed , Disabled , Retired

Q4) Single , In a relationship , Divorced , Widowed

Q5) Race : White , Black , Asian , Other  (please state \_\_\_\_\_)

Q6) Post code \_\_\_\_\_

Q7) Have you suffered with episodes of abdominal pains or discomfort for the last 6 months or more?  
Yes  No  - - if No, please go to Q16

Q8) If yes, how many days in a month do you approximately experience these abdominal pains or discomfort?

One day a month  Four days a month

Two days a month  5-10 days a month

Three days a month  More than 10 days a month

Q9) Do you suffer from abdominal bloating (feeling full of gas)? Yes  No

Q10) Do you feel an improvement in your abdominal pains or discomfort after you have emptied your bowels? Yes  No

Q11) Was the start of your abdominal pains or discomfort associated with a change in your bowel frequency? Yes  No

Q12) If yes to Q11, how would you best describe the predominant change in bowel habit?

Diarrhoea  , Constipation  , Alternates between Diarrhoea & Constipation

Q13) Was the start of your abdominal pains or discomfort associated with a change in stool consistency? Yes  No

Q14) If yes to Q13, how best would you describe your stool motions?

Loose, watery or sloppy  Hard, pellet like   
Combination of loose at times and hard other times

Q15) Do your abdominal and bowel symptoms get worse with stress? Yes  No

Q16) Are you known to suffer from any of the following? (tick as many that apply)

|                                                  |                          |                            |                          |
|--------------------------------------------------|--------------------------|----------------------------|--------------------------|
| Anxiety                                          | <input type="checkbox"/> | Chronic headaches          | <input type="checkbox"/> |
| Depression                                       | <input type="checkbox"/> | Nut allergy                | <input type="checkbox"/> |
| Bipolar disorder                                 | <input type="checkbox"/> | Egg allergy                | <input type="checkbox"/> |
| Schizophrenia                                    | <input type="checkbox"/> | Dairy product intolerance  | <input type="checkbox"/> |
| Thyroid disease                                  | <input type="checkbox"/> | Bowel cancer               | <input type="checkbox"/> |
| Young onset diabetes (childhood/early adulthood) | <input type="checkbox"/> | Stomach cancer             | <input type="checkbox"/> |
| Breast Cancer                                    | <input type="checkbox"/> | Heartburn/reflux           | <input type="checkbox"/> |
| Pernicious anaemia (low vitamin B12)             | <input type="checkbox"/> | Irritable bowel syndrome   | <input type="checkbox"/> |
| Chronic fatigue                                  | <input type="checkbox"/> | Coeliac disease            | <input type="checkbox"/> |
| Fibromyalgia                                     | <input type="checkbox"/> | Inflammatory bowel disease | <input type="checkbox"/> |
| ME                                               | <input type="checkbox"/> |                            |                          |

## Part 2 – Gluten related symptoms

This part of the questionnaire focuses on whether you develop problems when you eat gluten. Gluten is a product found in wheat, barley or rye. Therefore, it is found in common everyday diets such as cereal, bread, cakes, biscuits, pasta, pizza etc. Should you have any queries or difficulties completing this survey, please ask our helpful young student doctors!

Q1) Do you experience any of the following symptoms which you relate to eating gluten based products? (tick as many that apply)

- |                                                      |                                                               |
|------------------------------------------------------|---------------------------------------------------------------|
| Bloating (feel full of air) <input type="checkbox"/> | Headaches <input type="checkbox"/>                            |
| Abdominal Pain <input type="checkbox"/>              | Mental confusion <input type="checkbox"/>                     |
| Abdominal discomfort <input type="checkbox"/>        | Lack of co-ordination <input type="checkbox"/>                |
| Acid Regurgitation <input type="checkbox"/>          | Nausea/ Vomiting <input type="checkbox"/>                     |
| Diarrhoea <input type="checkbox"/>                   | Urgency to open bowels <input type="checkbox"/>               |
| Constipation <input type="checkbox"/>                | Feeling of incomplete bowel emptying <input type="checkbox"/> |
| Numbness/pins & needles <input type="checkbox"/>     | Fainting <input type="checkbox"/>                             |
| Lack of energy <input type="checkbox"/>              | Foggy Mind <input type="checkbox"/>                           |
| Belching <input type="checkbox"/>                    | Skin Rash <input type="checkbox"/>                            |
| Flatulence <input type="checkbox"/>                  | Joint Pains <input type="checkbox"/>                          |
| Anaemia <input type="checkbox"/>                     |                                                               |

Others (please specify) \_\_\_\_\_

**If you do not suffer from any gluten related symptoms, do not proceed. Thank you**

Q2) If yes, how often do you experience symptoms after eating gluten products?

- |                                                           |                                            |
|-----------------------------------------------------------|--------------------------------------------|
| Every time I eat gluten products <input type="checkbox"/> | Few times a month <input type="checkbox"/> |
| On most occasions/days <input type="checkbox"/>           | Few times a year <input type="checkbox"/>  |
| Few days a week <input type="checkbox"/>                  |                                            |

Q3) How soon after eating gluten products do you develop symptoms?

- |                                                                  |                                           |
|------------------------------------------------------------------|-------------------------------------------|
| Almost immediately (less than one hour) <input type="checkbox"/> | The next day <input type="checkbox"/>     |
| 1-6 hours later <input type="checkbox"/>                         | A few days later <input type="checkbox"/> |
| 6-24 hrs later <input type="checkbox"/>                          |                                           |

Q4) How long do your symptoms generally last for?

- Minutes     Hours     Days     Weeks     Months

Q5) Which gluten product(s) seems to cause problems? (tick as many that apply)

- |                                   |                                |                                   |
|-----------------------------------|--------------------------------|-----------------------------------|
| Bread <input type="checkbox"/>    | Pizza <input type="checkbox"/> | Cakes <input type="checkbox"/>    |
| Cereal <input type="checkbox"/>   | Pasta <input type="checkbox"/> | Biscuits <input type="checkbox"/> |
| Porridge <input type="checkbox"/> | Others (please state) _____    |                                   |

Q6) How long have you had a problem related to gluten?

(state approximate number) \_\_\_\_\_ months or \_\_\_\_\_ years

Q7) Have you ever seen a healthcare professional due to problems related to gluten? Yes  No

Q8) If yes, please state whom you have seen? (tick as many that apply)

GP  , Hospital doctor  , dietician  other  (please state) \_\_\_\_\_

Q9) If yes, have you undergone any of the following tests to look specifically for a cause as to why you have problems related to gluten? (tick as many that apply)

Coeliac blood test Yes  No  Not sure

Skin prick allergy test Yes  No  Not sure

Endoscopy (camera into stomach) Yes  No  Not sure

You have had no tests at all Yes

Other tests (please state) \_\_\_\_\_

Q10) If yes to Q7, Q8, Q9 have you been given any of the following diagnosis? (please ask the student doctor to explain the different conditions in more detail)

Coeliac disease  , Wheat allergy  , Coeliac disease has been excluded

No explanation given  , You are not sure  , other  \_\_\_\_\_

Q11) Have you ever tried a gluten free diet? Yes  No

Q12) If yes, was it beneficial for your symptoms? Yes  No  Not sure

Q13) If yes to Q11, Are you still on a gluten free diet? Yes  No

**Thank You – there are no further questions**
